# Supplementary material for: Insulin and α-Tocopherol Enhance the Protective Effect of Each Other on Brain Cortical Neurons under Oxidative Stress Conditions and in Rat Two-Vessel Forebrain Ischemia/Reperfusion Injury
Source: MDPI journal article supplement (doi:10.3390/ijms222111768), 2021-10-29
Supplement: s1 [file s1]

## Supplementary materials

**A**

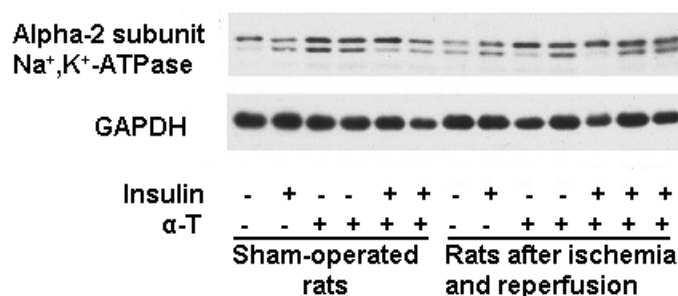

**B**

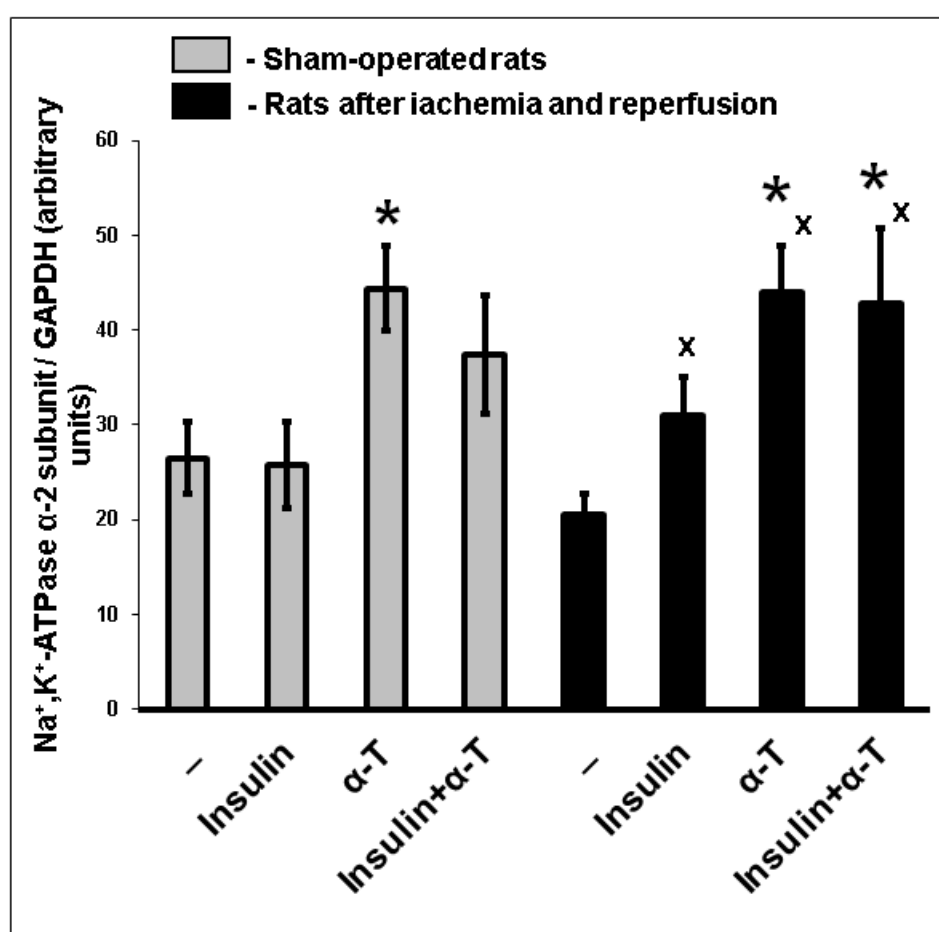

**Figure S1.** The effect of intranasally administered insulin and per-orally administered  $\alpha$ -T on the level of  $\alpha$ -2 subunit of  $\text{Na}^+\text{K}^+\text{-ATPase}$  in brain cortex of rats with two-vessel ischemia followed by reperfusion. A—immunoblots showing the level of  $\alpha$ -2 subunit of  $\text{Na}^+\text{K}^+\text{-ATPase}$  in brain cortex of rats with two-vessel ischemia followed by reperfusion. B—the data of 5–7 experiments are presented as means  $\pm$  SEM. The two-vessel ischemia was induced by ligation of carotid arteries for 20 minutes and hypotension followed by reperfusion for 1 h. Insulin was administered intranasally in a dose of 0.25 IU, while  $\alpha$ -T was given twice per-orally in a dose of 50 mg per kg of rat body weight. The differences are significant according to Student's *t*-test as compared with: \*—control values in sham-operated rats,  $p > 0.05$ , x—the effect of ischemia and reperfusion,  $p < 0.05$ .

**A**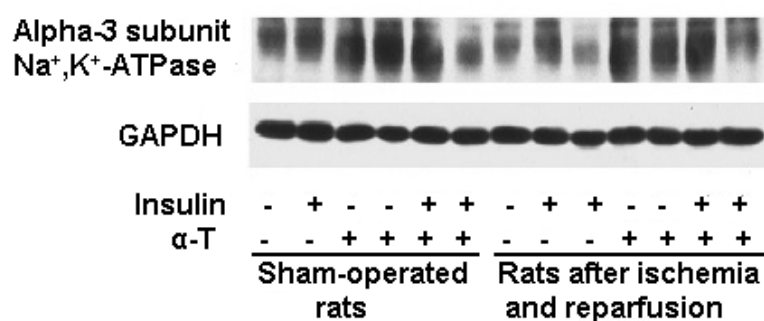**B**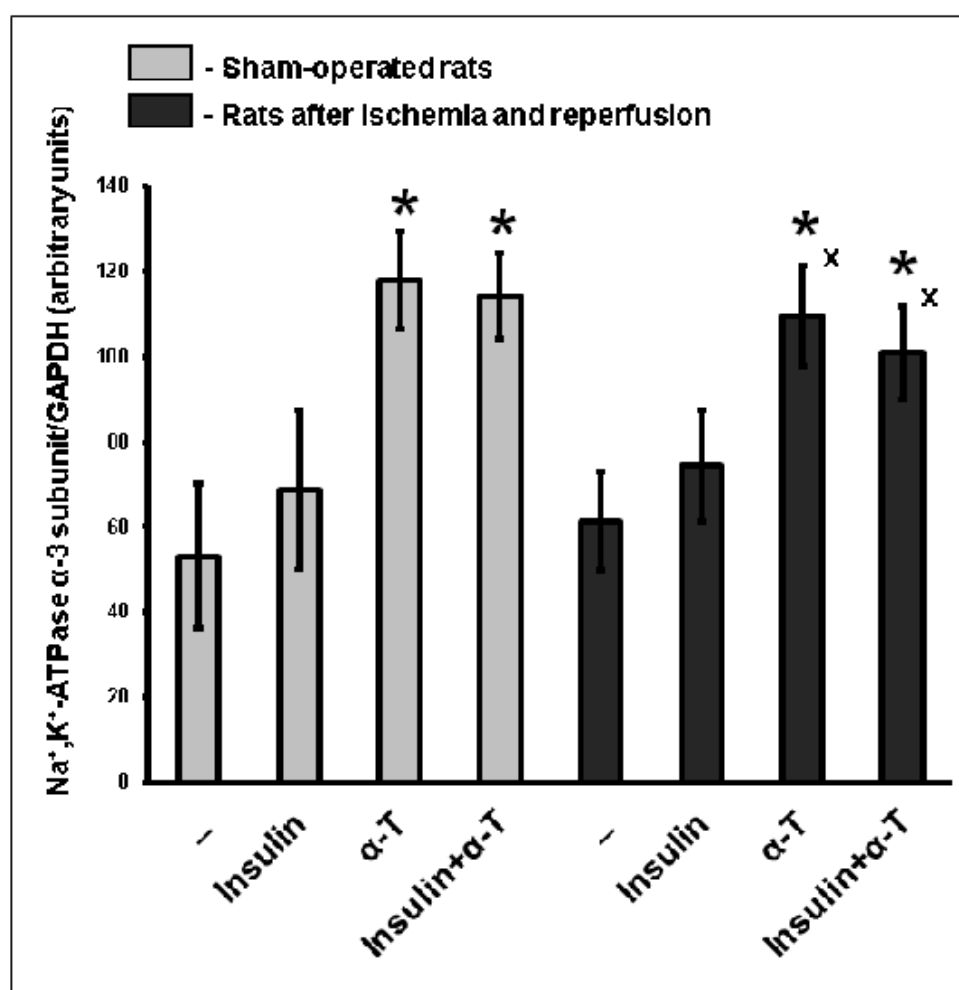

**Figure S2.** The effect of intranasally administered insulin and per-orally administered  $\alpha$ -T on the level of  $\alpha$ -3 subunit of  $\text{Na}^+, \text{K}^+$ -ATPase in brain cortex of rats with two-vessel ischemia followed by reperfusion. A—immunoblots showing the level of  $\alpha$ -3 subunit of  $\text{Na}^+, \text{K}^+$ -ATPase in brain cortex of rats with two-vessel ischemia followed by reperfusion. B—the data of 5–7 experiments are presented as means  $\pm$  SEM. The two-vessel ischemia was induced by ligation of carotid arteries for 20 minutes and hypotension followed by reperfusion for 1 h. Insulin was administered intranasally in a dose of 0.25 IU, while  $\alpha$ -T was given twice per-orally in a dose of 50 mg per kg of rat body weight. The differences are significant according to Student's *t*-test as compared with: \*—control values in sham-operated rats,  $p > 0.05$ , x—the effect of ischemia and reperfusion,  $p < 0.05$ .
